# Supplementary material for: Application of indole-3-butyric acid (IBA) enhances agronomic, physiological and antioxidant traits of Salvia fruticosa under saline conditions: a practical approach
Source: PeerJ. 2025 Jan 10;13:e18846. doi: 10.7717/peerj.18846 (PMC11727656; doi:10.7717/peerj.18846)
Supplement: Supplemental Information 1 [file peerj-13-18846-s001.xlsx]

## Sheet: Sheet1
Rep	Salinity	IBA	PH	FSL	RL	FRW	FSW	DRW	DSW	DRW/DSW	DROG	RWC	RMP	LSPAD	USPAD	EV	Flav	Phn	TAEC	IC50	ABTS
1	0 dS	0 ppm	42	14	39	7.31	17.93	0.95	4.02	23.6318	1.73	90.4762	11.18	41.4	40.3	432	310.4	87.1453	97.6645	2.29311	298.333
2	0 dS	0 ppm	45	29	39	11.48	22.95	1.69	5.54	30.5054	1.92	91	13.25	34.6	40.1	421	312	91.2173	100.22	2.25	304.333
3	0 dS	0 ppm	48	45	39	13.38	28.74	2.05	6.22	32.9582	2.08	88.22	9.43	38.4	42.2	450	305.6	92.405	95.41	2.27	316.333
4	0 dS	0 ppm	38.5	27	25	11	20.32	1.45	4.18	34.689	2.24	92.15	10.31	34.7	36.5	444	307.2	87.824	92.12	2.22	312.333
1	0 dS	1000 ppm	45	27	21	5.59	21.99	0.67	4.26	15.7277	2.28	85.8586	3.42	40.1	41.6	411	289.6	82.0553	90.1997	2.29433	287.333
2	0 dS	1000 ppm	46	25	34	8.2	26.69	1.07	6.01	17.8037	2.64	91.358	6.65	35.6	39.1	405	284.8	82.3947	92.12	2.27	286.333
3	0 dS	1000 ppm	44	23	28	5.88	21.75	0.81	4.67	17.3448	1.7	90.22	8.41	34.5	42.6	422	278.4	85.1093	88.12	2.29	333.333
4	0 dS	1000 ppm	46	28	30	6.71	17.44	0.9	3.89	23.1362	1.73	88.76	5.66	33.8	33	411	270.4	81.5463	91.12	2.22	307.333
1	0 dS	2000 ppm	64.5	29	30	7.83	14.96	1.07	3.61	29.6399	1.54	93	6.20444	31.8	38.5	472	328	76.9653	91.6215	2.36851	304.333
2	0 dS	2000 ppm	80	37	26	19.16	21.89	1.89	5.77	32.7556	2.43	86.3333	8.9	35.4	33.7	480	324.8	80.5283	90.15	2.31	307.333
3	0 dS	2000 ppm	65	32	31	20.51	24.81	2.26	5.51	41.0163	3	90.21	6.11	32.8	35.7	472	348.8	80.0193	91.12	2.22	324.333
4	0 dS	2000 ppm	84	38	24	19.38	20.8	2.42	5.64	42.9078	2.06	92.8	9.61	32.5	36.5	489	348.8	78.8317	89.45	2.45	335.333
1	6 dS	0 ppm	46.5	24.5	26.5	9.2	20.49	1.05	3.94	27.57	2.27	76.62	32.3	39.16	41.23	372	171.2	53.212	81.6685	2.76167	257.333
2	6 dS	0 ppm	46.5	24.5	26.5	9.2	20.49	1.05	3.94	27.57	2.27	76.62	32.3	40.1	42.7	390	177.6	57.1143	79.12	2.74	248.333
3	6 dS	0 ppm	48	28	23	9.9	24.63	1.13	4.82	23.444	2.96	79.42	37.11	34.3	42.4	360	158.4	54.739	84.62	2.7	269.333
4	6 dS	0 ppm	45	21	30	8.49	16.35	0.97	3.06	31.6993	1.58	73.82	27.49	43.1	38.6	355	164.8	54.5693	81.15	2.81	264.333
1	6 dS	1000 ppm	38	24	30	7.89	16.4	1.06	3.18	33.3333	1.31	80.3279	30.12	35.3	38.4	514	212.8	59.1503	99.4418	2.12631	194.333
2	6 dS	1000 ppm	45	29	32	10.35	19.39	1.27	4.05	31.358	1.7	91.4286	30.77	34.2	36.3	512	211.2	57.793	101.2	2.11	195.333
3	6 dS	1000 ppm	37	23	25	10.4	21.28	1.21	4.07	29.7297	2.5	85.9	31.83	40.4	39.2	515	208	61.1863	96.12	2.22	224.333
4	6 dS	1000 ppm	36	16	21	9.54	19.02	1.18	3.76	31.38	1.63	90.11	30.62	38.8	42.7	521	201.6	60.338	97.11	2.31	242.333
1	6 dS	2000 ppm	58	22	34	13.65	25.94	1.78	5.34	33.3333	2.53	95.1807	30.73	32.9	44.1	492	225.6	58.6413	96.9535	2.24526	226.333
2	6 dS	2000 ppm	68	36	27	13.86	25.9	1.46	5.3	27.5472	2.03	85.2459	28.55	32.2	36.3	490	228.8	57.6233	94.14	2.21	236.333
3	6 dS	2000 ppm	51	29	20	9.81	21.63	1.17	4.52	25.885	2.64	90.12	27.83	40.4	40.3	485	208	61.1863	95.66	2.19	259.333
4	6 dS	2000 ppm	51.5	20	33	13.54	23.47	1.58	3.97	39.7985	2.02	86.12	25.87	34.4	42.8	488	209.6	58.811	92.12	2.2	287.333
1	12 dS	0 ppm	3	1.75	8	0.53	0.54	0.08	0.46	17.3913	0.2	59	55.16	24.15	22.2	395	48	14.6977	68.5162	3.37485	117.333
2	12 dS	0 ppm	7	1	12	1.1	1.43	0.17	1.04	16.3462	0.33	57.1429	50.76	25.85	23.4	390	51.2	15.037	65.12	3.35	120.333
3	12 dS	0 ppm	9	3	22	1.17	2.2	0.12	1.16	10.3448	0.5	61.47	58.9	27.55	24.8	385	33.6	16.055	69.42	3.45	146.333
4	12 dS	0 ppm	5	2	14	1.33	2.03	0.27	0.63	42.8571	0.34	55.72	60.65	26.12	23.4	401	49.6	15.7157	70.11	3.31	147.333
1	12 dS	1000 ppm	30.99	2	13	1.83	1.33	0.17	0.99	17.1717	0.54	71.7949	30.11	30.6	28.6	489	137.6	40.1477	97.309	2.31088	143.333
2	12 dS	1000 ppm	37	16	25	2.58	5.65	0.36	1.25	28.8	0.5	83.8235	34.9	25.8	23	490	136	41.505	97.12	2.11	142.333
3	12 dS	1000 ppm	29	12	22	4.49	13.29	0.57	2.64	21.5909	1.7	79.34	33.78	36	35.1	495	156.8	38.96	99.41	2.25	196.333
4	12 dS	1000 ppm	26	13	24	3.82	12.21	0.53	2.58	20.5426	1.63	75.74	36.81	37.7	37.6	487	155.2	37.942	96.12	2.27	193.333
1	12 dS	2000 ppm	53	35	24	12.11	17.72	1.22	3.98	30.6533	2.4	87.8505	40.15	35.7	34.7	525	179.2	44.2197	102.641	2.2083	252.333
2	12 dS	2000 ppm	44	24	19	11.79	15.09	1.33	5.43	24.4936	2.01	92.4051	41.67	36.4	37.5	521	179.2	42.8623	101.2	2.19	252.333
3	12 dS	2000 ppm	61	23	29	11.19	11.83	1.51	3.36	44.9405	1.8	90.11	38.77	28.6	34.6	529	156.8	46.4253	96.12	2.16	302.333
4	12 dS	2000 ppm	56	24	22	7.3	20.65	0.89	6.42	13.8629	2.32	85.43	41.12	34.3	34.4	535	153.6	46.4253	99.15	2.21	322.333
1	18 dS	0 ppm	29	11	15	3.04	3.84	0.38	1.58	24.0506	0.37	42.55	72.22	26.45	24.7	408	49.6	18.2607	67.4498	3.434	140.333
2	18 dS	0 ppm	12	12	14	2.92	2.95	0.4	1.2	33.3333	0.77	39.14	65.82	23.85	23.85	411	52.8	18.2607	66.89	3.41	146.333
3	18 dS	0 ppm	7	11	8	2.13	2.11	0.23	1.29	17.8295	0.64	45.76	75.43	21.2	24.4	405	65.6	21.9933	65.12	3.35	189.333
4	18 dS	0 ppm	6	11	10	1.14	1.29	0.18	0.99	18.1818	0.41	36.86	71.8	22.85	23.85	399	59.2	21.145	65.41	3.37	172.333
1	18 dS	1000 ppm	50	16	20	7.36	10.54	1.05	2.87	36.5854	0.99	75.17	60.82	30.5	28.9	616	73.6	19.9573	78.8247	2.90996	96.3333
2	18 dS	1000 ppm	16	12	15	2	1.92	0.26	1.24	20.9677	1.1	76.16	58.9	27.85	28.85	612	75.2	20.8057	75.12	2.95	111.333
3	18 dS	1000 ppm	30	14	26	7.1	7.8	0.76	2.01	37.8109	0.78	71.9	61.14	25.2	28.8	605	76.8	20.8057	78.55	2.87	152.333
4	18 dS	1000 ppm	27	10	21	7.48	11.3	0.65	0.95	68.4211	0.78	74.76	62.12	27.85	28.85	609	70.4	20.4663	77.56	2.91	166.333
1	18 dS	2000 ppm	39	18.67	14.67	8.45	11.51	0.96	2.24	42.89	1.38	86.46	52.43	29.45	35.85	514	121.6	34.0397	99.7973	2.28389	176.333
2	18 dS	2000 ppm	44	25	12	8.21	7.42	0.94	2.05	45.8537	1.41	87.14	51.78	25.5	32.6	522	123.2	34.0397	96.12	2.25	192.333
3	18 dS	2000 ppm	29	13	16	10.72	15.96	1.19	2.86	41.6084	1.83	88.12	55.8	33.4	39.1	511	112	38.1117	96.77	2.27	263.333
4	18 dS	2000 ppm	44	18	16	6.41	11.16	0.75	1.82	41.2088	0.91	84.11	49.72	29.45	35.85	509	110.4	38.451	95.55	2.29	284.333
